# Supplementary material for: Seroprevalence Estimates of Latent and Acute Toxoplasma Infections in HIV+ People—Call for Action in Underprivileged Communities
Source: MDPI journal article supplement (doi:10.3390/microorganisms9102034), 2021-09-26
Supplement: s1 [file s1]

**Table S1.** Main features of studies included on the seroprevalences of latent and acute *Toxoplasma gondii* infection (LT and AT, respectively) in HIV+ people worldwide

| Author/Year/WHO region      | Reference | Study type | Country               | Diagnostic method used for LT | Diagnostic method used for AT | Human Development Index (HDI) | Income level | Risk of bias | No. of HIV+ people screened (total) | No. of HIV+ people with LT | No. of HIV+ people with AT |
|-----------------------------|-----------|------------|-----------------------|-------------------------------|-------------------------------|-------------------------------|--------------|--------------|-------------------------------------|----------------------------|----------------------------|
| South America               |           |            |                       |                               |                               |                               |              |              |                                     |                            |                            |
| Chaves-Borges et al. (1999) | [1]       | CS         | Brazil                | ELISA                         | IgG & IgM                     | High                          | UM           | Moderate     | 96                                  | 22                         | 4                          |
| Lago et al. (2009)          | [2]       | CS         | Brazil                | ELFA                          | NA                            | High                          | UM           | Low          | 168                                 | 103                        | na                         |
| Vidal et al. (2011)         | [3]       | CC         | Brazil                | IFAT                          | NA                            | High                          | UM           | Low          | 192                                 | 130                        | na                         |
| Fernandes et al. (2012)     | [4]       | CC         | Brazil                | ELISA                         | Seroconversion                | High                          | UM           | Moderate     | 82                                  | 49                         | 3                          |
| Xavier et al. (2013)        | [5]       | CS         | Brazil                | IFAT                          | IgG & IgM                     | High                          | UM           | Low          | 250                                 | 200                        | 0                          |
| Perez et al. (2009)         | [6]       | RC         | Chile                 | ELISA                         | NA                            | Very high                     | High         | Low          | 255                                 | 67                         | na                         |
| Maia et al. (2015)          | [7]       | CS         | Brazil                | ELISA                         | NA                            | High                          | UM           | Low          | 658                                 | 10                         | na                         |
| da Silva et al. (2017)      | [8]       | CS         | Brazil                | ELISA                         | NA                            | High                          | UM           | Low          | 769                                 | 447                        | na                         |
| da Silva et al. (2020)      | [9]       | CS         | Brazil                | ELISA                         | IgG & IgM                     | High                          | UM           | Low          | 435                                 | 242                        | 13                         |
| African region              |           |            |                       |                               |                               |                               |              |              |                                     |                            |                            |
| Quinn et al. (1987)         | [10]      | CC         | DR Congo              | IFAT                          | NA                            | Low                           | Low          | Moderate     | 38                                  | 28                         | na                         |
| Carme et al. (1988)         | [11]      | CS         | Congo                 | ELISA                         | NA                            | medium                        | Low          | Low          | 375                                 | 75                         | na                         |
| Zumla et al. (1991)         | [12]      | CC         | Uganda                | SFT                           | NA                            | Low                           | Low          | Low          | 186                                 | 64                         | na                         |
| Zumla et al. (1991)         | [12]      | CC         | Zambia                | SFT                           | NA                            | Medium                        | LM           | Low          | 187                                 | 8                          | na                         |
| Ledru et al. (1995)         | [13]      | CS         | Burkina Faso          | ELISA                         | NA                            | Low                           | Low          | Moderate     | 85                                  | 39                         | na                         |
| Woldemichael et al. (1998)  | [14]      | PC         | Ethiopia              | SFT                           | NA                            | Low                           | Low          | Low          | 170                                 | 136                        | na                         |
| Millogo et al. (2000)       | [15]      | CS         | Burkina Faso          | ELISA                         | NA                            | Low                           | Low          | Low          | 1828                                | 464                        | na                         |
| Alonso et al. (2002)        | [16]      | RC         | Canary island (Spain) | MEIA                          | IgG & IgM                     | Very high                     | High         | Low          | 157                                 | 56                         | 1                          |
| Uneke et al. (2005)         | [17]      | CC         | Nigeria               | ELISA                         | NA                            | Low                           | LM           | Low          | 219                                 | 85                         | na                         |
| Lindstrom et al. (2006)     | [18]      | CS         | Uganda                | DAT                           | NA                            | Low                           | Low          | Low          | 130                                 | 70                         | na                         |
| Simpore et al. (2006)       | [19]      | CS         | Burkina Faso          | ELISA                         | IgG & IgM                     | Low                           | Low          | Low          | 207                                 | 59                         | 0                          |
| Hari et al. (2007)          | [20]      | PC         | South Africa          | ELISA                         | IgG & IgM                     | Medium                        | UM           | Low          | 307                                 | 24                         | 3                          |
| Wester et al. (2006)        | [21]      | CS         | Botswana              | ELISA                         | IgG & IgM                     | High                          | UM           | Moderate     | 46                                  | 3                          | 0                          |
| Ouremi et al. (2009)        | [22]      | CS         | Burkina Faso          | ELISA                         | NA                            | Low                           | Low          | Low          | 138                                 | 44                         | na                         |
| Shimelis et al. (2009)      | [23]      | CC         | Ethiopia              | ELISA                         | NA                            | Low                           | Low          | Low          | 165                                 | 154                        | na                         |
| Sitoe et al. (2010)         | [24]      | CS         | Mozambique            | ELISA                         | NA                            | Low                           | Low          | Moderate     | 58                                  | 18                         | na                         |
| Huruy et al. (2010)         | [25]      | RC         | Ethiopia              | ELISA                         | NA                            | Low                           | Low          | Low          | 170                                 | 22                         | na                         |
| Oshinaike et al. (2010)     | [26]      | CC         | Nigeria               | ELISA                         | NA                            | Low                           | LM           | Moderate     | 83                                  | 71                         | na                         |
| Assob et al. (2011)         | [27]      | CS         | Cameroon              | ELISA                         | IgG & IgM                     | Low                           | LM           | Low          | 133                                 | 93                         | 3                          |
| Osunkalu et al. (2011)      | [28]      | CS         | Nigeria               | ELISA                         | NA                            | Low                           | LM           | Low          | 380                                 | 206                        | na                         |
| Pennap et al. (2011)        | [29]      | CS         | Nigeria               | ELISA                         | NA                            | Low                           | LM           | Low          | 184                                 | 32                         | na                         |
| Goni et al. (2012)          | [30]      | CS         | Nigeria               | ELISA                         | NA                            | Low                           | LM           | Low          | 110                                 | 21                         | na                         |
| Amuta et al. (2012)         | [31]      | CS         | Nigeria               | ELISA                         | NA                            | Low                           | LM           | Low          | 360                                 | 39                         | na                         |
| Aleme et al. (2013)         | [32]      | CS         | Ethiopia              | ELISA                         | IgG & IgM                     | Low                           | Low          | Low          | 150                                 | 141                        | 0                          |
| Uttah et al. (2013)         | [33]      | CS         | Nigeria               | ELISA                         | NA                            | Low                           | LM           | Moderate     | 72                                  | 20                         | na                         |
| Domingos et al. (2013)      | [34]      | CS         | Mozambique            | LAT                           | NA                            | Low                           | Low          | Low          | 200                                 | 92                         | na                         |
| Muluye et al. (2013)        | [35]      | CS         | Ethiopia              | LAT                           | NA                            | Low                           | Low          | Low          | 170                                 | 130                        | na                         |
| Ogoina et al. (2013)        | [36]      | CS         | Nigeria               | ELISA                         | IgG & IgM                     | Low                           | LM           | Low          | 111                                 | 42                         | 1                          |
| Walle et al. (2013)         | [37]      | CS         | Ethiopia              | ELISA                         | NA                            | Low                           | Low          | Low          | 103                                 | 90                         | na                         |
| Endris et al. (2014)        | [38]      | CS         | Ethiopia              | ELISA                         | NA                            | Low                           | Low          | Moderate     | 43                                  | 38                         | na                         |
| Okwuzu et al. (2014)        | [39]      | CS         | Nigeria               | ELISA                         | NA                            | Low                           | LM           | Low          | 242                                 | 100                        | na                         |
| Yohanes et al. (2014)       | [40]      | CS         | Ethiopia              | ELISA                         | NA                            | Low                           | Low          | Low          | 170                                 | 150                        | na                         |
| Yesuf and Melese, (2015)    | [41]      | CS         | Ethiopia              | ELISA                         | NA                            | Low                           | Low          | Low          | 120                                 | 72                         | na                         |
| Wam et al. (2016)           | [42]      | CS         | Cameroon              | ELISA                         | IgG & IgM                     | Low                           | LM           | Low          | 90                                  | 43                         | 11                         |
| Yusuf et al. (2016)         | [43]      | CS         | Nigeria               | ELISA                         | NA                            | Low                           | Low          | Low          | 273                                 | 84                         | na                         |
| Tegegne et al. (2016)       | [44]      | CS         | Ethiopia              | LAT                           | NA                            | Low                           | Low          | Low          | 135                                 | 109                        | na                         |
| Sanyaolu et al. (2016)      | [45]      | CS         | Nigeria               | ELISA                         | NA                            | Low                           | LM           | Moderate     | 65                                  | 2                          | na                         |
| Mirambo et al. (2016)       | [46]      | CS         | Tanzania              | ELISA                         | NA                            | Low                           | Low          | Moderate     | 38                                  | 26                         | na                         |
| Ayi et al. (2016)           | [47]      | CS         | Ghana                 | ELISA                         | IgG & IgM                     | Medium                        | LM           | Low          | 125                                 | 72                         | 0                          |
| Frimpong et al. (2017)      | [48]      | CS         | Zambia                | ELISA                         | IgG & IgM                     | Medium                        | LM           | Moderate     | 69                                  | 6                          | 0                          |
| Pappoe et al. (2017)        | [49]      | CS         | Ghana                 | ELISA                         | IgG & IgM                     | Medium                        | LM           | Low          | 394                                 | 293                        | 1                          |

|                                  |      |    |                |       |                |           |      |          |      |      |    |
|----------------------------------|------|----|----------------|-------|----------------|-----------|------|----------|------|------|----|
| Ngobeni and Samie (2017)         | [50] | CS | South Africa   | ELISA | IgG & IgM      | Medium    | UM   | Low      | 100  | 38   | 4  |
| Bamba et al. (2017)              | [51] | CS | Burkina Faso   | ELISA | IgG & IgM      | Low       | Low  | Low      | 290  | 85   | 0  |
| Jejaw Zeleke et al. (2017)       | [52] | CS | Ethiopia       | ELISA | IgG & IgM      | Low       | Low  | Low      | 270  | 255  | 6  |
| Katawa et al. (2018)             | [53] | CS | Togo           | ELISA | IgG & IgM      | Low       | Low  | Moderate | 56   | 14   | 2  |
| Olaniyan et al. (2019)           | [54] | CC | Nigeria        | ELISA | NA             | Low       | LM   | Moderate | 50   | 7    | na |
| Abongwa et al. (2019)            | [55] | CS | Cameroon       | ELISA | NA             | Low       | LM   | Moderate | 70   | 31   | na |
| Eastern Mediterranean region     |      |    |                |       |                |           |      |          |      |      |    |
| Yousif et al. (1994)             | [56] | CS | Bahrain        | ELISA | IgG & IgM      | Very high | High | Moderate | 76   | 16   | 0  |
| Davarpanah et al. (2007)         | [57] | CS | Iran           | ELISA | NA             | High      | UM   | Low      | 208  | 38   | na |
| Shafiei et al. (2011)            | [58] | CS | Iran           | ELISA | IgG & IgM      | High      | UM   | Low      | 121  | 46   | 3  |
| Daryani et al. (2011)            | [59] | CS | Iran           | ELISA | IgG & IgM      | High      | UM   | Moderate | 62   | 48   | 6  |
| Mohraz et al. (2011)             | [60] | CS | Iran           | ELISA | NA             | High      | UM   | Low      | 201  | 100  | na |
| Addebous et al. (2012)           | [61] | CS | Morocco        | ELISA | NA             | Medium    | LM   | Low      | 95   | 59   | na |
| Abdollahi et al. (2013)          | [62] | CC | Iran           | ELISA | NA             | High      | UM   | Low      | 100  | 65   | na |
| Khalil et al. (2013)             | [63] | CS | Sudan          | LAT   | NA             | Low       | LM   | Moderate | 44   | 33   | na |
| Alavi et al. (2013)              | [64] | CC | Iran           | ELISA | NA             | High      | UM   | Moderate | 42   | 31   | na |
| Rostami et al. (2014)            | [65] | CS | Iran           | ELISA | IgG & IgM      | High      | UM   | Low      | 94   | 18   | 1  |
| Rahimi et al. (2015)             | [66] | CS | Iran           | ELISA | IgG & IgM      | High      | UM   | Moderate | 82   | 79   | 0  |
| Zaini et al. (2016)              | [67] | CC | Saudi Arabia   | ELISA | IgG & IgM      | Very high | High | Moderate | 50   | 15   | 9  |
| Rezanezhad et al. (2017)         | [68] | CS | Iran           | ELISA | NA             | High      | UM   | Low      | 90   | 19   | na |
| Aghaee et al. (2017)             | [69] | CS | Iran           | ELISA | IgG & IgM      | High      | UM   | Moderate | 49   | 10   | 1  |
| Aghakhani et al. (2018)          | [70] | CS | Iran           | ELISA | IgG & IgM      | High      | UM   | Low      | 93   | 42   | 2  |
| Shafieenia et al. (2018)         | [71] | CS | Iran           | ELISA | IgG & IgM      | High      | UM   | Low      | 379  | 131  | 12 |
| Ebrahim Saraie et al. (2018)     | [72] | CS | Iran           | ELISA | NA             | High      | UM   | Low      | 246  | 51   | na |
| Arefkhah et al. (2018)           | [73] | CS | Iran           | ELISA | IgG & IgM      | High      | UM   | Low      | 251  | 39   | 0  |
| Nazari et al. (2018)             | [74] | CS | Iran           | ELISA | IgG & IgM      | High      | UM   | Low      | 385  | 157  | 10 |
| Bavand et al. (2019)             | [75] | CS | Iran           | ELISA | IgG & IgM      | High      | UM   | Low      | 149  | 69   | 4  |
| Ahmadpour et al. (2019)          | [76] | CS | Iran           | ELISA | IgG & IgM      | High      | UM   | Low      | 124  | 47   | 2  |
| Bokharaei-Salim et al. (2019)    | [77] | CS | Iran           | ELISA | IgG & IgM      | High      | UM   | Low      | 108  | 88   | 1  |
| Hosseini et al. (2020)           | [78] | CS | Iran           | ELISA | IgG & IgM      | High      | UM   | Low      | 102  | 70   | 0  |
| European region                  |      |    |                |       |                |           |      |          |      |      |    |
| Holliman (1990)                  | [79] | CS | UK             | SFT   | Seroconversion | Very high | High | Low      | 500  | 133  | 7  |
| Aspöck et al. (1990)             | [80] | PC | Austria        | IFAT  | NA             | Very high | High | Low      | 618  | 358  | na |
| Zangerle et al. (1991)           | [81] | PC | Austria        | IFAT  | NA             | Very high | High | Moderate | 41   | 19   | na |
| Sykora et al. (1992)             | [82] | CC | Czech Republic | CFT   | IgG & IgM      | Very high | High | Moderate | 67   | 20   | 0  |
| Zufferey et al. (1993)           | [83] | PC | Switzerland    | IFAT  | Seroconversion | Very high | High | Low      | 715  | 360  | 12 |
| Huengsberg et al. (1995)         | [84] | CC | UK             | LAT   | NA             | Very high | High | Low      | 109  | 31   | na |
| Champs et al. (1997)             | [85] | CS | France         | ELISA | IgG & IgM      | Very high | High | Moderate | 32   | 22   | 0  |
| Djurkovic-Djakovic et al. (1997) | [86] | RC | Serbia         | ELISA | IgG & IgM      | Very high | High | Low      | 288  | 127  | 0  |
| Garly et al. (1997)              | [87] | CS | Denmark        | IFAT  | Seroconversion | Very high | High | Low      | 503  | 223  | 4  |
| Reiter- Owona et al. (1998)      | [88] | RC | Germany        | SFT   | Seroconversion | Very high | High | Low      | 183  | 64   | 6  |
| Boto de los Bueis et al. (1998)  | [89] | CC | Spain          | MEIA  | NA             | Very high | High | Low      | 255  | 93   | na |
| Belanger et al. (1999)           | [90] | RC | France         | ELISA | Seroconversion | Very high | High | Low      | 1683 | 1215 | 14 |
| San-Andre’s et al. (2003)        | [91] | RC | Spain          | ELISA | NA             | Very high | High | Low      | 1018 | 422  | na |
| Llenas-García et al. (2012)      | [92] | RC | Spain          | ELISA | NA             | Very high | High | Low      | 371  | 13   | na |
| Csep and Drăghici (2013)         | [93] | CS | Romania        | ELISA | Seroconversion | Very high | High | Moderate | 30   | 6    | 2  |
| Kodym et al. (2015)              | [94] | RC | Czech Republic | ELISA | Seroconversion | Very high | High | Low      | 1235 | 502  | 14 |
| Dakovic Rode et al. (2010)       | [95] | CC | Croatia        | ELISA | IgG & IgM      | Very high | High | Low      | 166  | 86   | 2  |
| Aydin et al. (2011)              | [96] | CS | Turkey         | ELISA | IgG & IgM      | High      | UM   | Low      | 164  | 85   | 0  |
| Ene et al. (2016)                | [97] | CS | Romania        | ELISA | IgG & IgM      | Very high | High | Low      | 194  | 63   | 0  |
| Senoglu et al. (2018)            | [98] | RC | Turkey         | ELISA | IgG & IgM      | High      | UM   | Low      | 614  | 267  | 0  |
| North and Caribbean America      |      |    |                |       |                |           |      |          |      |      |    |

|                               |       |    |                  |       |                |           |      |          |      |     |    |
|-------------------------------|-------|----|------------------|-------|----------------|-----------|------|----------|------|-----|----|
| Quinn et al. (1987)           | [10]  | CC | USA              | IFAT  | IgG & IgM      | Very high | High | Moderate | 60   | 38  | 6  |
| Israelski et al. (1993)       | [99]  | CS | USA              | DAT   | Seroconversion | Very high | High | Low      | 443  | 42  | 4  |
| Grant et al. (1990)           | [100] | CS | USA              | IFAT  | Seroconversion | Very high | High | Low      | 411  | 130 | 4  |
| Wallace etal. (1993)          | [101] | RC | USA              | ELISA | Seroconversion | Very high | High | Low      | 723  | 70  | 13 |
| Fachado et al. (1994)         | [102] | PC | Cuba             | ELISA | NA             | High      | UM   | Moderate | 79   | 56  | na |
| Mathews (1994)                | [103] | CS | USA              | ELISA | NA             | Very high | UM   | Low      | 344  | 55  | na |
| Galvan Ramirez et al. (1997)  | [104] | CS | Mexico           | ELISA | IgG & IgM      | High      | UM   | Low      | 92   | 46  | 1  |
| Gongora-Biachi et al. (1998)  | [105] | CC | Mexico           | MEIA  | NA             | High      | UM   | Low      | 95   | 45  | na |
| Johns and Gill (1998)         | [106] | PC | Canada           | MEIA  | NA             | Very high | High | Low      | 1074 | 114 | na |
| Falusi et al. (2002)          | [107] | CS | USA              | SFT   | NA             | Very high | High | Low      | 1973 | 301 | na |
| Bharti et al. (2016)          | [108] | CS | USA              | ELISA | NA             | Very high | High | Low      | 263  | 30  | na |
| O'Bryan et al. (2016)         | [109] | RC | USA              | ELISA | NA             | Very high | High | Low      | 1645 | 223 | na |
| <b>South-East Asia region</b> |       |    |                  |       | NA             |           |      |          |      |     | na |
| Meisheri et al. (1997)        | [110] | CC | India            | ELISA | NA             | Medium    | LM   | Moderate | 89   | 60  | na |
| Sukthana et al. (2000)        | [111] | CC | Thailand         | ELISA | NA             | High      | UM   | Low      | 190  | 44  | na |
| Wanachiwanawin et al. (2001)  | [112] | CC | Thailand         | ELISA | IgG & IgM      | High      | UM   | Low      | 838  | 450 | 3  |
| Praharaj et al. (2001)        | [113] | CC | India            | ELISA | NA             | Medium    | LM   | Moderate | 80   | 18  | na |
| Malla et al. (2005)           | [114] | CC | India            | ELISA | IgG & IgM      | Medium    | LM   | Low      | 100  | 12  | 2  |
| Sucilathangam et al. (2012)   | [115] | CC | India            | ELISA | NA             | Medium    | LM   | Low      | 160  | 24  | na |
| Bhattacharyya et al. (2013)   | [116] | CS | India            | ELISA | NA             | Medium    | LM   | Low      | 100  | 42  | na |
| Anuradha and Preethi (2014)   | [117] | CS | India            | ELISA | NA             | Medium    | LM   | Low      | 92   | 32  | na |
| Chemoh et al (2015)           | [118] | CS | Thailand         | ELISA | IgG avidity    | High      | UM   | Low      | 300  | 109 | 26 |
| Haryati et al. (2015)         | [119] | CS | Indonesia        | ELISA | NA             | Medium    | LM   | Low      | 306  | 97  | na |
| Prasetyo et al. (2015)        | [120] | RC | Indonesia        | ELISA | IgG & IgM      | Medium    | LM   | Low      | 597  | 260 | 23 |
| Sari et al. (2015)            | [121] | CC | Indonesia        | ELISA | IgG & IgM      | Medium    | LM   | Low      | 140  | 56  | 6  |
| Uppal et al. (2015)           | [122] | CS | India            | ELISA | IgG avidity    | Medium    | LM   | Low      | 661  | 141 | 2  |
| Singh et al. (2015)           | [123] | RC | India            | ELISA | NA             | Medium    | LM   | Low      | 729  | 81  | na |
| Kasthuri (2018)               | [124] | PC | India            | ELISA | Seroconversion | Medium    | LM   | Low      | 207  |     | 5  |
| Pimpalkar et al. (2019)       | [125] | PC | India            | ELISA | IgG & IgM      | Medium    | LM   | Low      | 362  | 71  | 14 |
| Garg et al. (2019)            | [126] | CS | India            | ELISA | IgG & IgM      | Medium    | LM   | Low      | 400  | 51  | 4  |
| Halleyantoro et al. (2019)    | [127] | CS | Indonesia        | ELISA | NA             | Medium    | LM   | Moderate | 88   | 34  | na |
| <b>Western Pacific region</b> |       |    |                  |       |                |           |      |          |      |     |    |
| Yoong et al. (1997)           | [128] | CS | Malaysia         | ELISA | IgG & IgM      | Very high | UM   | Moderate | 49   | 24  | 1  |
| Oh et al. (1999)              | [129] | CS | South korea      | ELISA | NA             | Very high | High | Low      | 173  | 7   | na |
| Hagiwara et al. (2001)        | [130] | RC | Japan            | ELISA | NA             | Very high | High | Moderate | 56   | 7   | na |
| Zhou et al. (2001)            | [131] | CC | China            | MEIA  | NA             | High      | UM   | Moderate | 50   | 13  | na |
| Nissapatorn et al. (2002)     | [132] | CS | Malaysia         | ELISA | NA             | Very high | UM   | Low      | 100  | 21  | na |
| Nissapatorn et al. (2003)     | [133] | RC | Malaysia         | ELISA | NA             | Very high | UM   | Low      | 419  | 32  | na |
| Nissapatorn et al. (2003)     | [133] | CS | Malaysia         | ELISA | NA             | Very high | UM   | Low      | 301  | 124 | na |
| Nissapatorn et al. (2004)     | [134] | RC | Malaysia         | ELISA | NA             | Very high | UM   | Low      | 505  | 226 | na |
| Hung et al. (2005)            | [135] | CS | Taiwan           | ELISA | NA             | very high | High | Low      | 550  | 56  | na |
| Naito et al. (2007)           | [136] | CS | Japan            | ELISA | NA             | Very high | High | Moderate | 56   | 3   | na |
| Zhang et al. (2008)           | [137] | PC | China            | ELISA | NA             | High      | UM   | Low      | 168  | 13  | na |
| Hua et al. (2009)             | [138] | CC | China            | ELISA | NA             | High      | UM   | Low      | 259  | 25  | na |
| Tian et al. (2010)            | [139] | CC | China            | ELISA | NA             | High      | UM   | Low      | 309  | 3   | na |
| Song (2012)                   | [140] | CS | China            | ELISA | NA             | High      | UM   | Moderate | 50   | 5   | na |
| You et al. (2012)             | [141] | CS | China            | ELISA | NA             | High      | UM   | Low      | 927  | 325 | na |
| John et al. (2012)            | [142] | CC | Papua New Guinea | ELISA | NA             | Low       | LM   | Low      | 181  | 108 | na |
| Lim et al. (2013)             | [143] | CS | Singapore        | ELISA | NA             | Very high | High | Low      | 771  | 183 | na |
| Takahashi et al. (2014)       | [144] | RC | Japan            | ELISA | NA             | Very high | High | Low      | 169  | 24  | na |
| Pang et al. (2015)            | [145] | CS | China            | ELISA | NA             | High      | UM   | Low      | 450  | 32  | na |
| Angal et al. (2016)           | [146] | CC | Malaysia         | ELISA | IgG & IgM      | Very high | UM   | Low      | 133  | 84  | 2  |
| Chen et al. (2016)            | [147] | RC | China            | ELISA | NA             | High      | UM   | Low      | 342  | 84  | na |
| Shen et al. (2016)            | [148] | CC | China            | ELISA | IgG & IgM      | High      | UM   | Low      | 259  | 25  | 3  |
| Pang et al. (2018)            | [149] | CS | China            | ELISA | NA             | High      | UM   | Low      | 954  | 73  | na |
| Hoshina et al. (2019)         | [150] | CS | Japan            | ELISA | NA             | Very high | High | Low      | 399  | 33  | na |

**Abbreviation:** **na**, not assessed; **CC**, case-control; **CS**, cross sectional; **RC**, retrospective cohort; **PC**, prospective cohort; **LM**, lower middle; **UM**, upper middle; **ELISA**, enzyme-linked immunosorbent assay; **IFA**, immunofluorescence assay; **MAT**, modified agglutination test; **ELFA**, enzyme-linked fluorescent assay technique; **LAT**, latex agglutination test; **SFT**, Sabin-Feldman test; **Imx**

immunoassay, Abbott Toxo immunoglobulin G (IgG) assay; **MEIA**, microparticle enzyme immunoassay; **LFIA**, Lateral flow immunoassay assay; **DAT**, direct agglutination test; **DR** Congo, Democratic Republic of the Congo.

## References

1. Chaves-Borges, F.A.; Souza, M.A.; Silva, D.A.; Kasper, L.H.; Mineo, J.R. Detection of *Toxoplasma gondii* soluble antigen, SAG-1(p30), antibody and immune complex in the cerebrospinal fluid of HIV positive or negative individuals. *Rev. Inst. Med. Trop. Sao Paulo* **1999**, *41*, 329–338.
2. Lago, E.; Conrado, G.; Piccoli, C.; Carvalho, R.; Bender, A. *Toxoplasma gondii* antibody profile in HIV-infected pregnant women and the risk of congenital toxoplasmosis. *Eur. J. Clin. Microbiol. Infect. Dis.* **2009**, *28*, 345–351.
3. Vidal, J.E.; Diaz, A.V.; de Oliveira, A.C.; Dauar, R.F.; Colombo, F.A.; Pereira-Chioccia, V.L. Importance of high IgG anti-*Toxoplasma gondii* titers and PCR detection of *T. gondii* DNA in peripheral blood samples for the diagnosis of AIDS-related cerebral toxoplasmosis: a case-control study. *Braz. J. Infect. Dis.* **2011**, *15*, 356–359.
4. Fernandes, M.A.; Batista, G.I.; Carlos, J.d.C.S.; Gomes, I.M.; Azevedo, K.M.L.d.; Setúbal, S.; Oliveira, S.A.d.; Velarde, L.G.C.; Cardoso, C.A.A. *Toxoplasma gondii* antibody profile in HIV-1-infected and uninfected pregnant women and the impact on congenital toxoplasmosis diagnosis in Rio de Janeiro, Brazil. *Braz. J. Infect. Dis.* **2012**, *16*, 170–174.
5. Xavier, G.A.; Cademartori, B.G.; Cunha Filho, N.A.d.; Farias, N.A.d.R. Evaluation of seroepidemiological toxoplasmosis in HIV/AIDS patients in the south of Brazil. *Rev. Inst. Med. Trop. Sao Paulo* **2013**, *55*, 25–30.
6. Pérez, C.; Cerón, A.; Fuentes, L.; Zañartu, S.; Balcells, M.; Ajenjo, H.; Rabagliati, B.; Labarca, L.; Acuña, L. Hepatitis B, C, Treponema pallidum and *Toxoplasma gondii* co-infections in HIV infected patients. *Rev. Med. Chil.* **2009**, *137*, 8.
7. Maia, M.; Lage, E.M.; Moreira, B.; Deus, E.; Faria, J.G.; Pinto, J.A.; Melo, V.H. Prevalence of congenital and perinatal infection in HIV positive pregnant in Belo Horizonte metropolitan region. *Rev. Bras. Ginecol. Obstet.* **2015**, *37*, 421–427.
8. da Silva, C.M.; de Peder, L.D.; Menolli, R.A.; Takizawa, M.d.G.M.H.; Takizawa, M.C.H.; Horvath, J.D.; Silva, E.S.; Teixeira, J.J.V.; Bertolini, D.A. *Toxoplasma gondii*–soroprevalência em patients HIV no sul do Brasil. *Saúde (Santa Maria)*. **2017**, *43*, 73–80.
9. da Silva, B.E.B.; Santos, V.S.; Santos, I.E.R.; Batista, M.V.d.A.; Gonçalves, L.L.C.; Lemos, L.M.D.d. Prevalence of coinfections in women living with human immunodeficiency virus in Northeast Brazil. *Rev. Soc. Bras. Med.* **2020**, *53*, e20190282.
10. Quinn, T.C.; Piot, P.; McCormick, J.B.; Feinsod, F.M.; Taelman, H.; Kapita, B.; Stevens, W.; Fauci, A.S. Serologic and immunologic studies in patients with AIDS in North America and Africa: the potential role of infectious agents as cofactors in human immunodeficiency virus infection. *JAMA* **1987**, *257*, 2617–2621.
11. Carme, B.; M'Pele, P.; Mbitsi, A.; Kissila, A.; Aya, G.; Mouanga-Yidika, G.; Mboussa, J.; Itoua-Ngaporo, A. Opportunistic parasitic diseases and mycoses in AIDS. Their frequencies in Brazzaville (Congo). *Bull. Soc. Pathol. Exot. Filiales* **1988**, *81*, 311–316.
12. Zumla, A.; Savva, D.; Wheeler, R.B.; Hira, S.; Luo, N.; Kaleebu, P.; Sempala, S.; Johnson, J.D.; Holliman, R. *Toxoplasma* serology in Zambian and Ugandan patients infected with the human immunodeficiency virus. *Trans. R. Soc. Trop. Med. Hyg.* **1991**, *85*, 227–229.
13. Ledru, E.; Diagbouga, S.; Ledru, S.; Cauchoix, B.; Yameogo, M.; Chami, D.; Sanou, O.; Chiron, J.P. A study of *Toxoplasma* and Cytomegalovirus serology in tuberculosis and in HIV-infected patients in Burkina Faso. *Acta Trop.* **1995**, *59*, 149–154.
14. Woldemichael, T.; Fontanet, A.L.; Sahlu, T.; Gilis, H.; Messele, T.; Rinke de Wit, T.F.; Yeneneh, H.; Coutinho, R.A.; Van Gool, T. Evaluation of the Eiken latex agglutination test for anti-*Toxoplasma* antibodies and seroprevalence of *Toxoplasma* infection among factory workers in Addis Ababa, Ethiopia. *Trans. R. Soc. Trop. Med. Hyg.* **1998**, *92*, 401–403.
15. Millogo, A.; Ki-Zerbo, G.A.; Traore, W.; Sawadogo, A.B.; Ouedraogo, I.; Peghini, M. [*Toxoplasma* serology in HIV infected patients and suspected cerebral toxoplasmosis at the Central Hospital of Bobo-Dioulasso (Burkina Faso)]. *Bull. Soc. Pathol. Exot.* **2000**, *93*, 17–19.
16. Alonso, R.; Martinez, E.; Laynez, P.; Miguelez, M.; Pinero, J.E.; Valladares, B. Detection by nested-PCR of *Toxoplasma gondii* in patients infected with human immunodeficiency virus. *Med. Clin (Barc)*. **2002**, *118*, 294–296.
17. Uneke, C.J.; Duhlińska, D.D.; Njoku, M.O.; Ngwu, B.A. Seroprevalence of acquired toxoplasmosis in HIV-infected and apparently healthy individuals in Jos, Nigeria. *Parassitologia* **2005**, *47*, 233–236.
18. Lindstrom, I.; Kaddu-Mulindwa, D.H.; Kironde, F.; Lindh, J. Prevalence of latent and reactivated *Toxoplasma gondii* parasites in HIV-patients from Uganda. *Acta Trop.* **2006**, *100*, 218–222.
19. Simpoire, J.; Savadogo, A.; Ilboudo, D.; Nadambega, M.C.; Esposito, M.; Yara, J.; Pignatelli, S.; Pietra, V.; Musumeci, S. *Toxoplasma gondii*, HCV, and HBV seroprevalence and co-infection among HIV-positive and-negative pregnant women in Burkina Faso. *J. Med. Virol.* **2006**, *78*, 730–733.
20. Hari, K.R.; Modi, M.R.; Mochan, A.H.; Modi, G. Reduced risk of *Toxoplasma* encephalitis in HIV-infected patients—a prospective study from Gauteng, South Africa. *Int. J. STD AIDS* **2007**, *18*, 555–558.
21. Wester, C.W.; Bussmann, H.; Moyo, S.; Avalos, A.; Gaolathe, T.; Ndwapi, N.; Essex, M.; MacGregor, R.R.; Marlink, R.G. Serological evidence of HIV-associated infection among HIV-1—infected adults in Botswana. *Clin. Infect. Dis.* **2006**, *43*, 1612–1615.
22. Ouermi, D.; Simpoire, J.; Belem, A.; Sanou, D.; Karou, D.; Ilboudo, D.; Bisseye, C.; Onadja, S.; Pietra, V.; Pignatelli, S. Co-infection of *Toxoplasma gondii* with HBV in HIV-infected and uninfected pregnant women in Burkina Faso. *Pak. J. Biol. Sci.* **2009**, *12*, 1188.
23. Shimelis, T.; Tebeje, M.; Tadesse, E.; Tegbaru, B.; Terefe, A. Sero-prevalence of latent *Toxoplasma gondii* infection among HIV-infected and HIV-uninfected people in Addis Ababa, Ethiopia: A comparative cross-sectional study. *BMC Res. Notes*. **2009**, *2*, 213.
24. Siteo, S.P.B.L.; Rafael, B.; Meireles, L.R.; Andrade Jr, H.F.d.; Thompson, R. Preliminary report of HIV and *Toxoplasma gondii* occurrence in pregnant women from Mozambique. *Rev. Inst. Med. Trop. São Paulo* **2010**, *52*, 291–295.
25. Huruy, K.; Kassu, A.; Mulu, A.; Wondie, Y. Immune restoration disease and changes in CD4+ T-cell count in HIV- infected patients during highly active antiretroviral therapy at Zewditu memorial hospital, Addis Ababa, Ethiopia. *AIDS Res. Ther.* **2010**, *7*, 46.
26. Oshinaike, O.O.; Okubadejo, N.U.; Ojini, F.I.; Danesi, M.A. A preliminary study of the frequency of focal neurological deficits in HIV/AIDS patients seropositive for *Toxoplasma gondii* IgG in Lagos, Nigeria. *Nig. Q. J. Hosp. Med.* **2010**, *20*, 104–107.
27. Assob, J.C.; Njunda, A.L.; Nsagha, D.S.; Kamga, H.L.; Weledji, P.E.; Che, V. *Toxoplasma* antibodies amongst HIV/AIDS patients attending the University Teaching Hospital Yaounde in Cameroon. *Afr. J. Clin. Exp. Microbiol.* **2011**, *12*, 1119–1123.
28. Osunkalu, V.O.; Akanmu, S.A.; Ofomah, N.J.; Onyiaorah, I.V.; Adediran, A.A.; Akinde, R.O.; Onwuezobe, I.A. Seroprevalence of *Toxoplasma gondii* IgG antibody in HIV-infected patients at the Lagos University Teaching Hospital. *HIV AIDS (Auckl)* **2011**, *3*, 101–105.
29. Pennap, G.R.; Taiye, E.; Adoga, M. Seroprevalence of *Toxoplasma gondii* infection among people living with HIV/AIDS in Keffi. *J. Antivir. Antiretrovir.* **2011**, *3*, 38.
30. Goni, B.; Bakki, B.; Kida, I.; Yusuph, H.; Zailani, S.; Mustapha, S.; Tahir, A.; Sahabi, M.; Talle, M.; Baba, M. Seroprevalence of IgG anti-*T. gondii* antibody among HIV infected patients in Maiduguri, North eastern Nigeria. *J. Med. Sci.* **2012**, *6*, 7–14.
31. Amuta, E.; Amali, O.; Jacob, S.; Houmsou, R. *Toxoplasma gondii* IgG antibodies in HIV/AIDS patients attending hospitals in Makurdi metropolis, Benue state, Nigeria. *Int. J. Med. Biomed. Res.* **2012**, *1*, 186–192.

32. Aleme, H.; Tilahun, G.; Berhe, D.F.N.; Medhin, G. Sereoprevalence of immunoglobulin-G and of immunoglobulin-M anti-*Toxoplasma gondii* antibodies in human immunodeficiency virus infection/acquired immunodeficiency syndrome patients at Tikur Anbessa Specialized Hospital, Addis Ababa, Ethiopia. *J. Infect. Dis. Ther.* **2013**, *1*, 119.
33. Uttah, E.C.; Ajang, R.; Ogbeche, J.; Etta, H.; Etim, L. Comparative seroprevalence and risk factors of toxoplasmosis among three subgroups in Nigeria. *J. Nat. Sci. Res.* **2013**, *3*, 23–28.
34. Domingos, A.; Ito, L.S.; Coelho, E.; Lucio, J.M.; Matida, L.H.; Ramos, A.N., Jr. Seroprevalence of *Toxoplasma gondii* IgG antibody in HIV/AIDS-infected individuals in Maputo, Mozambique. *Rev. Saude Publica* **2013**, *47*, 890–896.
35. Muluye, D.; Wondimeneh, Y.; Belyhun, Y.; Moges, F.; Endris, M.; Ferede, G.; Yitayew, G.; Negese, D. Prevalence of *Toxoplasma gondii* and Associated Risk Factors among People Living with HIV at Gondar University Hospital, Northwest Ethiopia. *ISRN Trop. Med.* **2013**, *2013*, 5.
36. Ogoina, D.; Onyemelukwe, G.C.; Musa, B.O.; Obiako, R.O. Seroprevalence of IgM and IgG antibodies to *Toxoplasma* infection in healthy and HIV-positive adults from Northern Nigeria. *J. Infect. Dev. Ctries.* **2013**, *7*, 398–403.
37. Walle, F.; Kebede, N.; Tsegaye, A.; Kassa, T. Seroprevalence and risk factors for Toxoplasmosis in HIV infected and non-infected individuals in Bahir Dar, Northwest Ethiopia. *Parasites Vector* **2013**, *6*, 15.
38. Endris, M.; Belyhun, Y.; Moges, F.; Adefiris, M.; Tekeste, Z.; Mulu, A.; Kassu, A. Seroprevalence and associated risk factors of *Toxoplasma gondii* in pregnant women attending in Northwest Ethiopia. *Iran J. Parasitol.* **2014**, *9*, 407–414.
39. Okwuzu, J.; Odunukwe, N.; Ezechi, O.; Gbajabiamila, T.; Musa, A.; Ezeobi, P.; Oke, B.; Somefun, T.; Okoye, R.; Onyeitu, C. *Toxoplasma gondii* infection in HIV/AIDS: prevalence and risk factors. *Afr. J. Clin. Experiment. Microbiol.* **2014**, *15*, 97–102.
40. Yohanes, T.; Debalke, S.; Zemene, E. Latent *Toxoplasma gondii* Infection and Associated Risk Factors among HIV-Infected Individuals at Arba Minch Hospital, South Ethiopia. *AIDS Res. Treat.* **2014**, *2014*, 652941.
41. Yesuf, K.M.; Melese, Z.T. Prevalence of Toxoplasmosis in HIV/AIDS patients in Mettu Karl hospital. *Am. J. Heal Res.* **2015**, *3*, 183–188.
42. Wam, E.C.; Sama, L.F.; Ali, I.M.; Ebile, W.A.; Aghangu, L.A.; Tume, C.B. Seroprevalence of *Toxoplasma gondii* IgG and IgM antibodies and associated risk factors in women of child-bearing age in Njinikom, NW Cameroon. *BMC Res. Notes* **2016**, *9*, 406.
43. Yusuf, A.; Yahaya, S.; Azeez-Akande, O. Seroprevalence and risk factors of *Toxoplasma gondii* infection (toxoplasmosis) among HIV seropositive pregnant women in a tertiary healthcare centre, Kano, Northern Nigeria. *J. Med. Med. Sci.* **2016**, *7*, 1–5.
44. Tegegne, D.; Abdurahaman, M.; Mosissa, T.; Yohannes, M. Anti-*Toxoplasma* antibodies prevalence and associated risk factors among HIV patients. *Asian Pac. J. Trop. Med.* **2016**, *9*, 460–464.
45. Sanyaolu, A.; Oyibo, W.; Iriemenam, N.; Badaru, O. Sero-prevalence study of parasitic infections among HIV positive and negative patients in Lagos, Nigeria. *Afr. J. Clin. Experiment. Microbiol.* **2016**, *17*, 88–96.
46. Mirambo, M.M.; Kivambe, C.; Mushi, M.F.; Zinga, M.; Mngumi, E.B.; Mtebe, M.; Mshana, S.E. High seroprevalence of specific *Toxoplasma gondii* IgG antibodies among HIV/AIDS patients with immunological failure attending a tertiary hospital in northwestern Tanzania. *Tanzania J. Health Res.* **2016**, *18*.
47. Ayi, I.; Sowah, A.O.-K.; Blay, E.A.; Suzuki, T.; Ohta, N.; Ayeh-Kumi, P.F. *Toxoplasma gondii* infections among pregnant women, children and HIV-seropositive persons in Accra, Ghana. *Trop. Med. Health* **2016**, *44*, 17.
48. Frimpong, C.; Makasa, M.; Sitali, L.; Michelo, C. Seroprevalence and determinants of toxoplasmosis in pregnant women attending antenatal clinic at the university teaching hospital, Lusaka, Zambia. *BMC Infect. Dis.* **2017**, *17*, 10.
49. Pappoe, F.; Cheng, W.; Wang, L.; Li, Y.; Obiri-Yeboah, D.; Nuvor, S.V.; Ambachew, H.; Hu, X.; Luo, Q.; Chu, D., et al. Prevalence of *Toxoplasma gondii* infection in HIV-infected patients and food animals and direct genotyping of *T. gondii* isolates, Southern Ghana. *Parasitol. Res.* **2017**, *116*, 1675–1685.
50. Ngobeni, R.; Samie, A. Prevalence of *Toxoplasma gondii* IgG and IgM and associated risk factors among hiv-positive and hiv-negative patients in vhembe district of South Africa. *Afr. J. Infect. Dis.* **2017**, *11*, 1–9.
51. Bamba, S.; Zoungrana, J.; Nikiema, Z.; Sondo, A.K.; Ndiaye, J.L.; Bretagne, S. Impact of alternative treatment approach for cerebral toxoplasmosis among HIV/AIDS patients from a resource-poor setting in Burkina Faso. *Ann. Parasitol.* **2017**, *63*, 173–181.
52. Zeleke, A.J.; Melsew, Y.A. Seroprevalence of *Toxoplasma gondii* and associated risk factors among HIV-infected women within reproductive age group at Mizan Aman General Hospital, Southwest Ethiopia: a cross sectional study. *BMC Res. Notes* **2017**, *10*, 70.
53. Katawa, G.; Kolou, M.; Nadjir, L.K.; Ataba, E.; Bomboma, G.; Karou, S.D. CD4 T-Lymphocytes Count in HIV-*Toxoplasma gondii* Co-Infected Pregnant Women Undergoing a Prevention of Mother-to-Child Transmission Program. *J. Biosci. Med.* **2018**, *6*, 76.
54. Olaniyan, M.F.; Kilo, O.A. Immunochemical evidence of Trypanosoma cruzi and *Toxoplasma gondii* parasitic infections in human immunodeficiency virus/acquired immunodeficiency syndrome subjects in relationship with the CD4+ count. *Imam J. Appl. Sci.* **2019**, *4*, 16.
55. Abongwa, L.E.; Signang, A.; Tibi, S.; Ngenwi, A. Socio-demographic and Obstetric Variations of *T. gondii* and HIV-1 Co-infection among Pregnant Women in Cameroon. *J. Adv. Microbiol.* **2019**, *16*, 1–11.
56. Yousif, A.; Wallace, M.; Baig, B. The seroprevalence of syphilis, toxoplasmosis and hepatitis B in patients in Bahrain infected with human immunodeficiency virus. *Trans. R. Soc. Trop. Med. Hyg.* **1994**, *88*, 60.
57. Davarpanah, M.; Mehrabani, D.; Neirami, R.; Ghahremanpoori, M.; Darvishi, M. Toxoplasmosis in HIV/AIDS patients in Shiraz, southern Iran. *Iran Red. Crescent Med. J.* **2007**, *9*, 22–27.
58. Shafiei, R.; Riazzi, Z.; Sarvghad, M.; Galian Sharifdini, M.; Mahmoodzadeh, A.; Hajia, M. Prevalence of IgG and IgM anti-*Toxoplasma gondii* antibodies in HIV positive patients in northeast of Iran. *Iran J. Pathol.* **2011**, *6*, 68–72.
59. Daryani, A.; Sharif, M.; Meigouni, M. Seroprevalence of IgG and IgM anti-*Toxoplasma* antibodies in HIV/AIDS patients, northern Iran. *Asian Pac. J. Trop. Med.* **2011**, *4*, 271–274.
60. Mohraz, M.; Mehrkhani, F.; Jam, S.; SeyedAlinaghi, S.; Sabzviri, D.; Fattahi, F.; Jabbari, H.; Hajiabdolbaghi, M. Seroprevalence of toxoplasmosis in HIV(+)/AIDS patients in Iran. *Acta Med. Iran.* **2011**, *49*, 213–218.
61. Addebous, A.; Adarmouch, L.; Tali, A.; Laboudi, M.; Amine, M.; Aajly, L.; Rhajaoui, M.; Chabaa, L.; Zougaghi, L. IgG anti-*Toxoplasma* antibodies among asymptomatic HIV-infected patients in Marrakesh-Morocco. *Acta Trop.* **2012**, *123*, 49–52.
62. Abdollahi, A.; Shoar, S.; Sheikhbahaei, S.; Jafari, S. Sero-prevalence of Cytomegalovirus and *Toxoplasma* infections among newly diagnosed HIV patients in Iran; assessing the correlation with CD4+ cell counts. *Iran J. Pathol.* **2013**, *8*, 81–88.
63. Khalil, M.; Ahmed, A.A.; Elrayah, I.E. Prevalence and Risk factors for *Toxoplasma gondii* infection in Humans from Khartoum State, Sudan. *Int. J. Public Health Epidemiol.* **2013**, *2*, 60–66.
64. Alavi, S.M.; Jamshidian, R.; Salmanzadeh, S. Comparative study on *Toxoplasma* serology among HIV positive and HIV negative illicit drug users in Ahvaz, Iran. *Caspian J. Intern. Med.* **2013**, *4*, 781–784.
65. Rostami, A.; Keshavarz, H.; Shojae, S.; Mohebbali, M.; Meamar, A.R. Frequency of *Toxoplasma gondii* in HIV Positive Patients from West of Iran by ELISA and PCR. *Iran J. Parasitol.* **2014**, *9*, 474–481.
66. Rahimi, M.T.; Mahdavi, S.A.; Javadian, B.; Rezaei, R.; Moosazadeh, M.; Khadamlou, M.; Seyedpour, S.H.; Syadatpanah, A. High Seroprevalence of *Toxoplasma gondii* Antibody in HIV/AIDS Individuals from North of Iran. *Iran J. Parasitol.* **2015**, *10*, 584–589.
67. Zaini, R.G.; Ismail, K.A.; Dahlawi, H. Seroprevalence of *Toxoplasma gondii* among AIDS Patients in Saudi Arabia. *World J. AIDS* **2016**, *6*, 81–86.

68. Rezanezhad, H.; Sayadi, F.; Shadmand, E.; Nasab, S.D.M.; Yazdi, H.R.; Solhjoo, K.; Kazemi, A.; Maleki, M.; Vasmehjani, A.A. Seroprevalence of *Toxoplasma gondii* among HIV Patients in Jahrom, Southern Iran. *Korean J. Parasitol.* **2017**, *55*, 99–103.
69. Aghaee, R.; Saki, S.S.; Didehdar, M.; Hajihosseini, R.; Eslamirad, Z. Epidemiologic evaluation of toxoplasmosis and leading risk factors in HIV/AIDS patients in Arak City, Iran. *Australas Med. J.* **2017**, *10*, 865–869.
70. Aghakhani, A.; Velayati, A.A.; Bavand, A.; Banifazl, M.; Ramezani, A. Seroprevalence of *Toxoplasma gondii* in Iranian HIV Infected Patients. *ECCMID* **2018**, *28*, 1386.
71. Shafieenia, S.; Saki, J.; Khademvatan, S.; Moradi-Choghakabodi, P. Molecular and Serological Evaluation of Toxoplasmosis in AIDS Cases in Southwest Iran. *Jundishapur J. Microbiol.* **2018**, *11*.
72. Ebrahim-Saraie, H.S.; Heidari, H.; Mousavi, S.; Asefi, H.; Abadi, A.; Afsar-Kazerooni, P.; Motamedifar, M. *Toxoplasma gondii* seroprevalence and related risk factors in patients with HIV in Iran. *Arch. Hell. Med.* **2018**, *35*, 400–404.
73. Arefkhah, N.; Sarkari, B.; Afrashteh, M.; Rezaei, Z.; Dehghani, M. *Toxoplasma gondii*: The Prevalence and Risk Factors in HIV-Infected Patients in Fars Province, Southern Iran. *Iran Red. Crescent Med. J.* **2018**, *20*, e66521.
74. Nazari, N.; Bozorgomid, A.; Janbakhsh, A.; Bashiri, F. *Toxoplasma gondii* and human immunodeficiency virus co-infection in western Iran: A cross sectional study. *Asian Pac. J. Trop. Med.* **2018**, *11*, 58.
75. Bavand, A.; Aghakhani, A.; Mohraz, M.; Banifazl, M.; Karami, A.; Golkar, M.; Babaie, J.; Saleh, P.; Mamishi, S.; Ramezani, A. Prevalence of *Toxoplasma gondii* Antibodies and DNA in Iranian HIV Patients. *Iran J. Pathol.* **2019**, *14*, 68–75.
76. Ahmadpour, E.; Pishkarie-Asl, R.; Spotin, A.; Samadi, H.K.; Didarlu, H.; Azadi, Y.; Barac, A. Sero-molecular evaluation of *Toxoplasma gondii* infection among HIV-positive patients. *Trans. R. Soc. Trop. Med. Hyg.* **2019**, *113*, 771–775.
77. Bokharaei-Salim, F.; Esteghamati, A.; Khanaliha, K.; Kalantari, S.; Sayyahfar, S.; Donyavi, T.; Garshasbi, S.; Asgari, Q.; Salemi, B. Evaluation of a PCR assay for diagnosis of toxoplasmosis in serum and peripheral blood mononuclear cell among HIV/AIDS patients. *J. Parasit. Dis.* **2020**, *44*, 159–165.
78. Hosseini, S.A.; Sharif, M.; Sarvi, S.; Abediankenari, S.; Hashemi-Soteh, M.B.; Amouei, A.; Montazeri, M.; Aghayan, S.A.; Gholami, S.; Shaker, D. Genetic characterization of *Toxoplasma gondii* in Iranian HIV positive patients using multilocus nested-PCR-RFLP method. *Parasitology* **2020**, *147*, 322–328.
79. Holliman, R.E. Serological study of the prevalence of toxoplasmosis in asymptomatic patients infected with human immunodeficiency virus. *Epidemiol. Infect.* **1990**, *105*, 415–418.
80. Aspöck, H.; Hassl, A. Parasitic infections in HIV patients in Austria: first results of a long-term study. *Zentralbl. Bakteriologie* **1990**, *272*, 540–546.
81. Zangerle, R.; Allerberger, F.; Pohl, P.; Fritsch, P.; Dierich, M.P. High risk of developing toxoplasmic encephalitis in AIDS patients seropositive to *Toxoplasma gondii*. *Med. Microbiol. Immunol.* **1991**, *180*, 59–66.
82. Sykora, J.; Zastera, M.; Stankova, M. Toxoplasmic antibodies in sera of HIV-infected persons. *Folia Parasitol.* **1992**, *39*, 177–180.
83. Zufferey, J.; Sugar, A.; Rudaz, P.; Bille, J.; Glauser, M.P.; Chave, J.P. Prevalence of latent toxoplasmosis and serological diagnosis of active infection in HIV-positive patients. *Eur. J. Clin. Microbiol. Infect. Dis.* **1993**, *12*, 591–595.
84. Huengsborg, M.; Jayaweera, D.T.; Wagstaffe, S.; Opaneye, A.A.; Wade, A.A.; Shahmanesh, M. *Toxoplasma* seroprevalence in HIV-positive patients in West Midlands. *Int. J. STD AIDS* **1995**, *6*, 223.
85. Champs, C.D.; Pelloux, H.; Cambon, M.; Fricker-Hidalgo, H.; Goullier-Fleuret, A.; Ambroise-Thomas, P. Evaluation of the second generation IMx Toxo IgG antibody assay for detection of antibodies to *Toxoplasma gondii* in human sera. *J. Clin. Lab. Anal.* **1997**, *11*, 214–219.
86. Djurković-Djoković, O.; Bobić, B.; Vuković, D.; Marinković, J.; Jevtović, D. Risk for toxoplasmic encephalitis in AIDS patients in Yugoslavia. *Int. J. Infect. Dis.* **1997**, *2*, 74–78.
87. Garly, M.L.; Petersen, E.; Pedersen, C.; Lundgren, J.D.; Gerstoft, J. Toxoplasmosis in Danish AIDS patients. *Scand. J. Infect. Dis.* **1997**, *29*, 597–600.
88. Reiter-Owona, I.; Bialek, R.; Rockstroh, J.; Seitz, H. The probability of acquiring primary *Toxoplasma* infection in HIV-infected patients: results of an 8-year retrospective study. *Infection* **1998**, *26*, 20–25.
89. Boto de los Bueis, A.; Vega Aleman, D.; Galvez Acebal, J.; Merino Munoz, D.; Creagh Cerquera, R.; Pujol de la Llave, E. Prevalence of latent *Toxoplasma* infection in HIV infection patients. *An. Med. Interna.* **1998**, *15*, 298–300.
90. Belanger, F.; Derouin, F.; Grangeot-Keros, L.; Meyer, L.; HEMOCO; Groups, S.S. Incidence and risk factors of toxoplasmosis in a cohort of human immunodeficiency virus-infected patients: 1988–1995. *Clin. Infect. Dis.* **1999**, *28*, 575–581.
91. San-Andrés, F.-J.; Rubio, R.; Castilla, J.; Pulido, F.; Palao, G.; de Pedro, I.; Costa, J.-R.; del Palacio, A. Incidence of acquired immunodeficiency syndrome-associated opportunistic diseases and the effect of treatment on a cohort of 1115 patients infected with human immunodeficiency virus, 1989–1997. *Clin. Infect. Dis.* **2003**, *36*, 1177–1185.
92. Llenas-García, J.; Rubio, R.; Hernando, A.; Fiorante, S.; Maseda, D.; Matarranz, M.; Costa, J.; Alonso, B.; Pulido, F. Clinico-epidemiological characteristics of HIV-positive immigrants: study of 371 cases. *Enferm. Infecc. Microbiol. Clin.* **2012**, *30*, 441–451.
93. Csep, A.; Drăghici, S. *Toxoplasma gondii* infection in immunocompromised individuals. *BMC Infect. Dis.* **2013**, *13*, P4.
94. Kodym, P.; Malý, M.; Beran, O.; Jilich, D.; Rozsypal, H.; Machala, L.; Holub, M. Incidence, immunological and clinical characteristics of reactivation of latent *Toxoplasma gondii* infection in HIV-infected patients. *Epidemiol. Infect.* **2015**, *143*, 600–607.
95. Đaković-Rode, O.; Židovec-Lepej, S.; Vodnica Martucci, M.; Lasica Polanda, V.; Begovac, J. Prevalence of antibodies against *Toxoplasma gondii* in patients infected with human immunodeficiency virus in Croatia. *Infektološki Glasnik* **2010**, *30*, 5–10.
96. Aydın, Ö.A.; Karaosmanoğlu, H.K.; Korkusuz, R.; Nazlıcan, Ö. HIV/AIDS Hastalarında *Toxoplasma gondii* IgG Seroprevalansı. *Türkiye Parazitol. Derg.* **2011**, *35*, 65–67.
97. Ene, L.; Marcotte, T.D.; Umlauf, A.; Grancea, C.; Temereanca, A.; Bharti, A.; Achim, C.L.; Letendre, S.; Ruta, S.M. Latent toxoplasmosis is associated with neurocognitive impairment in young adults with and without chronic HIV infection. *J. Neuroimmunol.* **2016**, *299*, 1–7.
98. Senoglu, S.; Yesilbag, Z.; Altuntas Aydin, O.; Kumbasar Karaosmanoglu, H.; Kart Yasar, K. *Toxoplasma gondii* IgG Seroprevalence in Patients with HIV/AIDS. *Türkiye Parazitol. Derg.* **2018**, *42*, 175–179.
99. Israelski, D.M.; Chmiel, J.S.; Poggensee, L.; Phair, J.P.; Remington, J.S. Prevalence of *Toxoplasma* infection in a cohort of homosexual men at risk of AIDS and toxoplasmic encephalitis. *J. Acquir. Immune Defic. Syndr.* **1993**, *6*, 414–418.
100. Grant, I.H.; Gold, J.W.; Rosenblum, M.; Niedzwiecki, D.; Armstrong, D. *Toxoplasma gondii* serology in HIV-infected patients: the development of central nervous system toxoplasmosis in AIDS. *AIDS* **1990**, *4*, 519–521.
101. Wallace, M.R.; Rossetti, R.J.; Olson, P.E. Cats and toxoplasmosis risk in HIV-infected adults. *JAMA* **1993**, *269*, 76–77.
102. Fachado, A.; Fonte, L.; Alberti, E.; Hadad, P.; Fonseca, L.; Machin, R.; Finlay, C. Usefulness of the detection of *Toxoplasma gondii* antigens in AIDS patients. *Rev. Inst. Med. Trop. Sao Paulo* **1994**, *36*, 525–529.
103. Mathews, W.C.; Fullerton, S.C. Use of a clinical laboratory database to estimate *Toxoplasma* seroprevalence among human immunodeficiency virus-infected patients. Overcoming bias in secondary analysis of clinical records. *Arch. Pathol. Lab. Med.* **1994**, *118*, 807–810.
104. Galvan Ramirez, M.L.; Valdez Alvarado, V.; Vargas Gutierrez, G.; Jimenez Gonzalez, O.; Garcia Cosio, C.; Vielma Sandoval, M. Prevalence of IgG and IgM anti-*Toxoplasma* antibodies in patients with HIV and acquired immunodeficiency syndrome (AIDS). *Rev. Soc. Bras. Med. Trop.* **1997**, *30*, 465–467.
105. Gongora-Biachi, R.A.; Gonzalez-Martinez, P.; Castro-Sansores, C.; Alvarez-Moguel, R.; Pavia-Ruz, N.; Lara-Perera, D.; Alonzo-Salomon, G.; Palacios-Perez, E. [Antibodies against *Toxoplasma gondii* in patients with HIV in Yucatan]. *Rev. Invest. Clin.* **1998**, *50*, 419–422.



106. Johns, D.G.; Gill, M.J. Seroprevalence of cytomegalovirus, *Toxoplasma gondii*, syphilis, and hepatitis B and C virus infections in a regional population seropositive for HIV infection. *Can. J. Infect. Dis.* **1998**, *9*, 209–214.
107. Falusi, O.; French, A.L.; Seaberg, E.C.; Tien, P.C.; Watts, D.H.; Minkoff, H.; Piessens, E.; Kovacs, A.; Anastos, K.; Cohen, M.H. Prevalence and predictors of *Toxoplasma* seropositivity in women with and at risk for human immunodeficiency virus infection. *Clin. Infect. Dis.* **2002**, *35*, 1414–1417.
108. Bharti, A.R.; McCutchan, A.; Deutsch, R.; Smith, D.M.; Ellis, R.J.; Cherner, M.; Woods, S.P.; Heaton, R.K.; Grant, I.; Letendre, S.L. Latent *Toxoplasma* Infection and Higher *Toxoplasma gondii* Immunoglobulin G Levels Are Associated With Worse Neurocognitive Functioning in HIV-Infected Adults. *Clin. Infect. Dis.* **2016**, *63*, 1655–1660.
109. O'Bryan, T.A.; Okulicz, J.F.; Bradley, W.P.; Ganesan, A.; Merritt, S.E.; Agan, B.K. *Toxoplasma gondii* seroprevalence: 30-year trend in an HIV-infected US military cohort. *Diagn. Microbiol. Infect. Dis.* **2016**, *84*, 34–35.
110. Meisheri, Y.V.; Mehta, S.; Patel, U. A prospective study of seroprevalence of Toxoplasmosis in general population, and in HIV/AIDS patients in Bombay, India. *J. Postgrad. Med.* **1997**, *43*, 93–97.
111. Sukthana, Y.; Chintana, T.; Lekkla, A. *Toxoplasma gondii* antibody in HIV-infected persons. *J. Med. Assoc. Thai.* **2000**, *83*, 681–684.
112. Wanachiwanawin, D.; Sutthent, R.; Chokephalbulkit, K.; Mahakittikun, V.; Ongrotchanakun, J.; Monkong, N. *Toxoplasma gondii* antibodies in HIV and non-HIV infected Thai pregnant women. *Asian Pac. J. Allergy Immunol.* **2001**, *19*, 291.
113. Praharaj, C.A.; Singh, S.P.; Chander, C.Y.; Nagendra, A. Serological diagnosis of *Toxoplasma gondii* infection in various patient population in the armed forces. *Med. J. Armed Forces India* **2001**, *57*, 298–301.
114. Malla, N.; Sengupta, C.; Dubey, M.; Sud, A.; Dutta, U. Antigenaemia and antibody response to *Toxoplasma gondii* in human immunodeficiency virus-infected patients. *Br. J. Biomed. Sci.* **2005**, *62*, 19–23.
115. Sucilathangam, G.; Palaniappan, N.; Sreekumar, C.; Anna, T. Seroprevalence of *Toxoplasma gondii* in southern districts of Tamil Nadu using IgG-ELISA. *J. Parasit. Dis.* **2012**, *36*, 159–164.
116. Bhattacharyya, S.; Khurana, S.; Dubey, M.L. Anti-*Toxoplasma gondii* antibody detection in serum and urine samples by enzyme-linked immunosorbent assay in HIV-infected patients. *Indian J. Pathol. Microbiol.* **2013**, *56*, 20–23.
117. Anuradha, B.; Preethi, C. Seroprevalence of *Toxoplasma* IgG Antibodies in HIV Positive Patients in and Around Khammam, Telangana State. *J. Clin. Diagn. Res.* **2014**, *8*, 101–102.
118. Chemoh, W.; Sawangjaroen, N.; Siripaitoon, P.; Andiappan, H.; Hortiwakul, T.; Sermwittayawong, N.; Charoenmak, B.; Nissapatorn, V. *Toxoplasma gondii* - Prevalence and Risk Factors in HIV-infected Patients from Songklanagarind Hospital, Southern Thailand. *Front. Microbiol.* **2015**, *6*, 1304.
119. Haryati, S.; Prasetyo, A.A.; Sariyatun, R.; Sari, Y.; Murkati. Interferon- $\gamma$  +874A/T polymorphism associated with *Toxoplasma gondii* seropositivity in HIV patients. *Asian Pac. J. Trop. Dis.* **2015**, *5*, 798–803.
120. Prasetyo, A.A.; Sariyatun, R.; Reviono; Sari, Y.; Hudiyono; Haryati, S.; Adnan, Z.A.; Hartono; Kageyama, S. The APOBEC3B deletion polymorphism is associated with prevalence of hepatitis B virus, hepatitis C virus, Torque Teno virus, and *Toxoplasma gondii* co-infection among HIV-infected individuals. *J. Clin. Virol.* **2015**, *70*, 67–71.
121. Sari, Y.; Haryati, S.; Raharjo, I.; Prasetyo, A.A. *Toxoplasma* and viral antibodies among HIV patients and inmates in central Java, Indonesia. *Southeast Asian J. Trop. Med. Public Health* **2015**, *46*, 977–985.
122. Uppal, B.; Aggarwal, P.; Perween, N.; Sud, A. Seroprevalence of *Toxoplasma* among HIV infected and HIV non-infected individuals in North India. *Asian Pac. J. Trop. Dis.* **2015**, *5*, S15–S18.
123. Singh, L.; Mishra, S.; Prasanna, S.; Cariappa, M.P. Seroprevalence of TORCH infections in antenatal and HIV positive patient populations. *Med. J. Armed Forces India* **2015**, *71*, 135–138.
124. Kasthuri, A. A prospective cohort study on incidence of “opportunistic infections” among HIV infected ART naïve rural people of Kanchipuram district. *Int. J. Community Med. Public Health* **2018**, *5*, 2770–2774.
125. Pimpalkar, S.; Mishra, M.; Kurhade, A.; Unakal, C.; Kurhade, G.; Powar, R. Prevalence of Toxoplasmosis among HIV/AIDS Patients and Correlation of Radiological Investigations with Laboratory Findings. *Microbiol. Res. J. Int.* **2018**, *26*, 1–10.
126. Garg, S.; Sharma, B.; Bithu, R.; Vyas, N. Seroprevalence of IgM and IgG antibodies to *Toxoplasma* infection in human immunodeficiency virus-positive antiretroviral therapy-naïve individuals. *Muller J. Med. Sci. Res.* **2019**, *10*, 8–12.
127. Halleyantoro, R.; Andriyani, Y.; Sari, I.P.; Kurniawan, A. Nested PCR methods for detection *Toxoplasma gondii* B1 gene in Cerebrospinal Fluid of HIV patients. *J. Biomed. Transl. Res.* **2019**, *5*, 62–66.
128. Yoong, K.-Y.; Cheong, I. A study of Malaysian drug addicts with human immunodeficiency virus infection. *Int. J. STD AIDS* **1997**, *8*, 118–123.
129. Oh, M.-d.; Park, S.W.; Kim, H.B.; Kim, U.S.; Kim, N.J.; Choi, H.J.; Shin, D.H.; Lee, J.S.; Choe, K. Spectrum of opportunistic infections and malignancies in patients with human immunodeficiency virus infection in South Korea. *Clin. Infect. Dis.* **1999**, *29*, 1524–1528.
130. Hagiwara, E.; Ito, A.; Shirai, A.; Kawada, K.; Okubo, T.; Amano, T.; Ishigatsubo, Y. Seroprevalence of anti-*Toxoplasma* IgG antibody in Japanese patients with HIV infection. *Kansenshogaku Zasshi* **2001**, *75*, 703.
131. Zhou, M.; Huang, X.; Ku, D. Survey of co-infection with HIV and *Toxoplasma gondii* among Xinjiang People. *Chin. J. Zoonosis.* **2001**, *17*, 127.
132. Nissapatorn, V.; Kamarulzaman, A.; Init, I.; Tan, L.H.; Rohela, M.; Norliza, A.; Chan, L.L.; Latt, H.M.; Anuar, A.K.; Quek, K.F. Seroepidemiology of toxoplasmosis among HIV-infected patients and healthy blood donors. *Med. J. Malaysia* **2002**, *57*, 304–310.
133. Nissapatorn, V.; Lee, C.K.; Cho, S.M.; Rohela, M.; Anuar, A.K.; Quek, K.F.; Latt, H.M. Toxoplasmosis in HIV/AIDS patients in Malaysia. *Southeast Asian J. Trop. Med. Public Health* **2003**, *34 Suppl 2*, 80–85.
134. Nissapatorn, V.; Lee, C.; Quek, K.F.; Leong, C.L.; Mahmud, R.; Abdullah, K.A. Toxoplasmosis in HIV/AIDS patients: a current situation. *Jpn. J. Infect. Dis.* **2004**, *57*, 160–165.
135. Hung, C.-C.; Chen, M.; Hsieh, S.; Hsiao, C.; Sheng, W.-H.; Chang, S.-C. Prevalence of *Toxoplasma gondii* infection and incidence of *Toxoplasma* encephalitis in non-haemophilic HIV-1-infected adults in Taiwan. *Int. J. STD AIDS* **2005**, *16*, 302–306.
136. Naito, T.; Inui, A.; Kudo, N.; Matsumoto, N.; Fukuda, H.; Isonuma, H.; Sekigawa, I.; Dambara, T.; Hayashida, Y. Seroprevalence of IgG anti-*Toxoplasma* antibodies in asymptomatic patients infected with human immunodeficiency virus in Japan. *Intern. Med.* **2007**, *46*, 1149–1150.
137. Zhang, X.; Xu, J.; Peng, H.; Ma, Y.; Han, L.; Ruan, Y.; Su, B.; Wang, N.; Shao, Y. HCV coinfection associated with slower disease progression in HIV-infected former plasma donors naïve to ART. *PLoS One.* **2008**, *3*.
138. Hua, H.; Huan, X.; Dong, M.; al., e. Survey on infection of *Toxoplasma gondii* in HIV/AIDS patients. *Chin. J. Mod. Med.* **2009**, *11*, 47–49.
139. Tian, L.; Cheng, G.; Chen, J.; al., e. Survey on coinfection with *Toxoplasma* and HIV among rural people in China. *Chin. J. Schisto. Control* **2010**, *22*.
140. Song, R. Relationship between *Toxoplasma* IgG and routine screening items of infectious diseases of blood donors. *Chin. J. Schisto. Control* **2012**, *24*, 371–372.
141. You, Y.; Li, W.; Shen, L.; Nie, D. Serological investigation of *Toxoplasma gondii* infection in HIV positive cases in Dali and Dehong of Yunnan. *Chinese J. Parasitol. Parasit. Dis.* **2012**, *30*, 418–419.
142. John, L.N.; McBride, W.J.; Millan, J.; Wilson, K. Seroprevalence of anti-*Toxoplasma gondii* antibodies in HIV/AIDS patients and healthy blood donors at the Port Moresby General Hospital, Papua New Guinea. *PNG Med. J.* **2012**, *55*, 88–93.
143. Lim, R.B.; Tan, M.T.; Young, B.; Lee, C.C.; Leo, Y.S.; Chua, A.; Ng, O.T. Risk factors and time-trends of cytomegalovirus (CMV), syphilis, toxoplasmosis and viral hepatitis infection and seroprevalence in human immunodeficiency virus (HIV) infected patients. *Ann. Acad. Med. Singapore* **2013**, *42*, 667–673.

144. Takahashi, H.; Tsubouchi, A.; Murai, K.; Yamanouchi, M.; Tanei, M.; Sakamoto, R.; Uehara, Y.; Fan, C.; Naito, T. Seroprevalence of *Toxoplasma gondii* infection among HIV-infected patients in Tokyo, Japan. *Clin. Res. HIV/AIDS* **2014**, *1*, 1007.

145. Pang, X.; Chen, S.; Gao, K.; al, e. Serum epidemiological analysis of opportunistic infection of pathogenic protozoa in HIV/AIDS. *J. Trop. Med.* **2015**, *15*, 1425.

146. Angal, L.; Lim, Y.; Yap, N.; Ngui, R.; Amir, A.; Kamarulzaman, A.; Rohela, M. Toxoplasmosis in HIV and non HIV prisoners in Malaysia. *Trop. Biomed.* **2016**, *33*, 159–169.

147. Chen, X.; Ye, M.; Zhou, Y.H.; Liu, F.L.; Duo, L.; Li, H.; Pang, W.; Zheng, Y.T. High seroprevalence of *Toxoplasma gondii* and HIV-1 co-infection among drug users in Yunnan province, southwest China. *Sci. China Life Sci.* **2016**, *59*, 857–859.

148. Shen, G.; Wang, X.; Sun, H.; Gao, Y. Seroprevalence of *Toxoplasma gondii* infection among HIV/AIDS patients in Eastern China. *Korean J. Parasitol.* **2016**, *54*, 93–96.

149. Pang, W.; Shang, P.; Li, Q.; Xu, J.; Bi, L.; Zhong, J.; Pei, X. Prevalence of Opportunistic Infections and Causes of Death among Hospitalized HIV-Infected Patients in Sichuan, China. *Tohoku J. Exp. Med.* **2018**, *244*, 231–242.

150. Hoshina, T.; Horino, T.; Saiki, E.; Aonuma, H.; Sawaki, K.; Miyajima, M.; Lee, K.; Nakaharai, K.; Shimizu, A.; Hosaka, Y. Seroprevalence and associated factors of *Toxoplasma gondii* among HIV-infected patients in Tokyo: A cross sectional study. *J. Infect. Chemother.* **2020**, *26*, 33–37.

| Section/topic             | #  | Checklist item                                                                                                                                                                                                                                                                                              | Reported on page #               |
|---------------------------|----|-------------------------------------------------------------------------------------------------------------------------------------------------------------------------------------------------------------------------------------------------------------------------------------------------------------|----------------------------------|
| TITLE                     |    |                                                                                                                                                                                                                                                                                                             |                                  |
| Title                     | 1  | Identify the report as a systematic review, meta-analysis, or both.                                                                                                                                                                                                                                         | Title, page 1                    |
| ABSTRACT                  |    |                                                                                                                                                                                                                                                                                                             |                                  |
| Structured summary        | 2  | Provide a structured summary including, as applicable: background; objectives; data sources; study eligibility criteria, participants, and interventions; study appraisal and synthesis methods; results; limitations; conclusions and implications of key findings; systematic review registration number. | Abstract, pages 2 and 3          |
| INTRODUCTION              |    |                                                                                                                                                                                                                                                                                                             |                                  |
| Rationale                 | 3  | Describe the rationale for the review in the context of what is already known.                                                                                                                                                                                                                              | Introduction, paragraphs 1 and 2 |
| Objectives                | 4  | Provide an explicit statement of questions being addressed with reference to participants, interventions, comparisons, outcomes, and study design (PICOS).                                                                                                                                                  | Introduction                     |
| METHODS                   |    |                                                                                                                                                                                                                                                                                                             |                                  |
| Protocol and registration | 5  | Indicate if a review protocol exists, if and where it can be accessed (e.g., Web address), and, if available, provide registration information including registration number.                                                                                                                               | there is no published protocol   |
| Eligibility criteria      | 6  | Specify study characteristics (e.g., PICOS, length of follow-up) and report characteristics (e.g., years considered, language, publication status) used as criteria for eligibility, giving rationale.                                                                                                      | Method, section 2.1              |
| Information sources       | 7  | Describe all information sources (e.g., databases with dates of coverage, contact with study authors to identify additional studies) in the search and date last searched.                                                                                                                                  | Method, section 2.1              |
| Search                    | 8  | Present full electronic search strategy for at least one database, including any limits used, such that it could be repeated.                                                                                                                                                                               | Supplementary Figure 1           |
| Study selection           | 9  | State the process for selecting studies (i.e., screening, eligibility, included in systematic review, and, if applicable, included in the meta-analysis).                                                                                                                                                   | Method, section 2.1              |
| Data collection process   | 10 | Describe method of data extraction from reports (e.g., piloted forms, independently, in duplicate) and any processes for obtaining and confirming data from investigators.                                                                                                                                  | Method, section 2.2              |
| Data items                | 11 | List and define all variables for which data were sought (e.g., PICOS, funding sources) and any assumptions and simplifications made.                                                                                                                                                                       | Method, section 2.2              |



|                                    |    |                                                                                                                                                                                                                        |                     |
|------------------------------------|----|------------------------------------------------------------------------------------------------------------------------------------------------------------------------------------------------------------------------|---------------------|
| Risk of bias in individual studies | 12 | Describe methods used for assessing risk of bias of individual studies (including specification of whether this was done at the study or outcome level), and how this information is to be used in any data synthesis. | Method, section 2.2 |
| Summary measures                   | 13 | State the principal summary measures (e.g., risk ratio, difference in means).                                                                                                                                          | Method, section 2.3 |
| Synthesis of results               | 14 | Describe the methods of handling data and combining results of studies, if done, including measures of consistency (e.g., $I^2$ ) for each meta-analysis.                                                              | Method, section 2.3 |

| Section/topic                 | #  | Checklist item                                                                                                                                                                                           | Reported on page #                             |
|-------------------------------|----|----------------------------------------------------------------------------------------------------------------------------------------------------------------------------------------------------------|------------------------------------------------|
| Risk of bias across studies   | 15 | Specify any assessment of risk of bias that may affect the cumulative evidence (e.g., publication bias, selective reporting within studies).                                                             | Method, section 2.3                            |
| Additional analyses           | 16 | Describe methods of additional analyses (e.g., sensitivity or subgroup analyses, meta-regression), if done, indicating which were pre-specified.                                                         | Method, section 2.3                            |
| <b>RESULTS</b>                |    |                                                                                                                                                                                                          |                                                |
| Study selection               | 17 | Give numbers of studies screened, assessed for eligibility, and included in the review, with reasons for exclusions at each stage, ideally with a flow diagram.                                          | Results, section 3.1<br>Supplementary figure 2 |
| Study characteristics         | 18 | For each study, present characteristics for which data were extracted (e.g., study size, PICOS, follow-up period) and provide the citations.                                                             | Results, section 3.1<br>supplementary table 1  |
| Risk of bias within studies   | 19 | Present data on risk of bias of each study and, if available, any outcome level assessment (see item 12).                                                                                                | Results, table2                                |
| Results of individual studies | 20 | For all outcomes considered (benefits or harms), present, for each study: (a) simple summary data for each intervention group (b) effect estimates and confidence intervals, ideally with a forest plot. | Results, Table 1, and 2                        |
| Synthesis of results          | 21 | Present results of each meta-analysis done, including confidence intervals and measures of consistency.                                                                                                  | Results, tables                                |
| Risk of bias across studies   | 22 | Present results of any assessment of risk of bias across studies (see Item 15).                                                                                                                          | Not applicable                                 |
| Additional analysis           | 23 | Give results of additional analyses, if done (e.g., sensitivity or subgroup analyses, meta-regression [see Item 16]).                                                                                    | results and table 2                            |
| <b>DISCUSSION</b>             |    |                                                                                                                                                                                                          |                                                |
| Summary of evidence           | 24 | Summarize the main findings including the strength of evidence for each main outcome; consider their relevance to key groups (e.g., healthcare providers, users, and policy makers).                     | Discussion, Paragraphs 1                       |
| Limitations                   | 25 | Discuss limitations at study and outcome level (e.g., risk of bias), and at review-level (e.g., incomplete retrieval of identified research, reporting bias).                                            | Discussion, Paragraphs 4                       |
| Conclusions                   | 26 | Provide a general interpretation of the results in the context of other evidence, and implications for future research.                                                                                  | Discussion, Paragraphs 5                       |
| <b>FUNDING</b>                |    |                                                                                                                                                                                                          |                                                |
| Funding                       | 27 | Describe sources of funding for the systematic review and other support (e.g., supply of data); role of funders for the systematic review.                                                               | Method, paragraph 1                            |

**PRISMA Checklist From:** Moher D, Liberati A, Tetzlaff J, Altman DG, The PRISMA Group (2009). Preferred Reporting Items for Systematic Reviews and Meta-Analyses: The PRISMA Statement. PLoS Med 6(7): e1000097. doi:10.1371/journal.pmed1000097  
For more information, visit: [www.prisma-statement.org](http://www.prisma-statement.org).
